# Supplementary material for: Dye-sensitized solar cells with enhanced efficiency using hierarchical TiO2spheres as a scattering layer
Source: Royal Society of Chemistry journal article supplement (doi:10.1039/c4ra03723e), 2014-07-30
Supplement: c4ra03723e1.pdf [file c4ra03723e1.pdf]

## Supporting Information

### Improved Efficiency of Dye Sensitized Solar Cells Using Hollow Sphere TiO<sub>2</sub> Hierarchical Structures as a Scattering Layer

Fujian Lv, Shengxiong Xiao\*, Jian Zhu, Hexing Li \*

Department of Chemistry, Key Laboratory of Resource Chemistry of Ministry of Education, Shanghai Normal University, Shanghai 200234, China, \* Address correspondence: Fax: +(86)21-64322272; Tel: +(86)21-64321673; E-mail: Hexing-Li@shnu.edu.cn

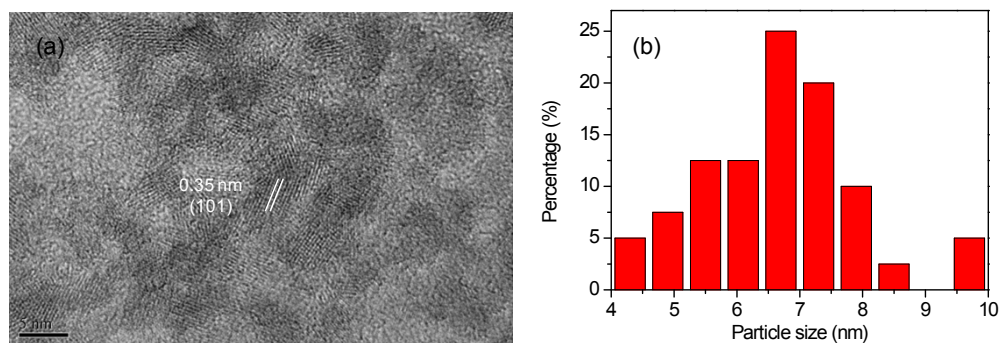

**Fig. S1.** (a) HRTEM image indicative of anatase TiO<sub>2</sub> lattice and (b) the particle size distribution pattern of the TiO<sub>2</sub> film deposited on the FTO substrate.

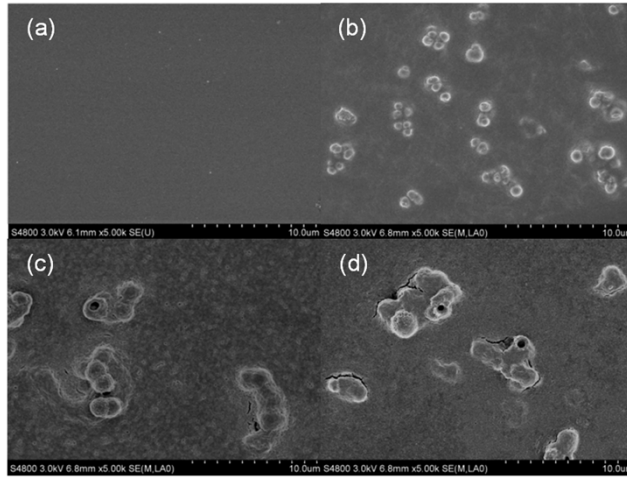

**Fig. S2** FESEM images of TiO<sub>2</sub> anodes containing (a) pure TiO<sub>2</sub> film (TF-C) and TiO<sub>2</sub> film with scattering layers containing (b) solid TiO<sub>2</sub> microspheres (SP-C), (c) core-shell TiO<sub>2</sub> microspheres (CS-C), and (d) hollow TiO<sub>2</sub> microspheres (HS-C) covered by an outer-layer of TiO<sub>2</sub> film.

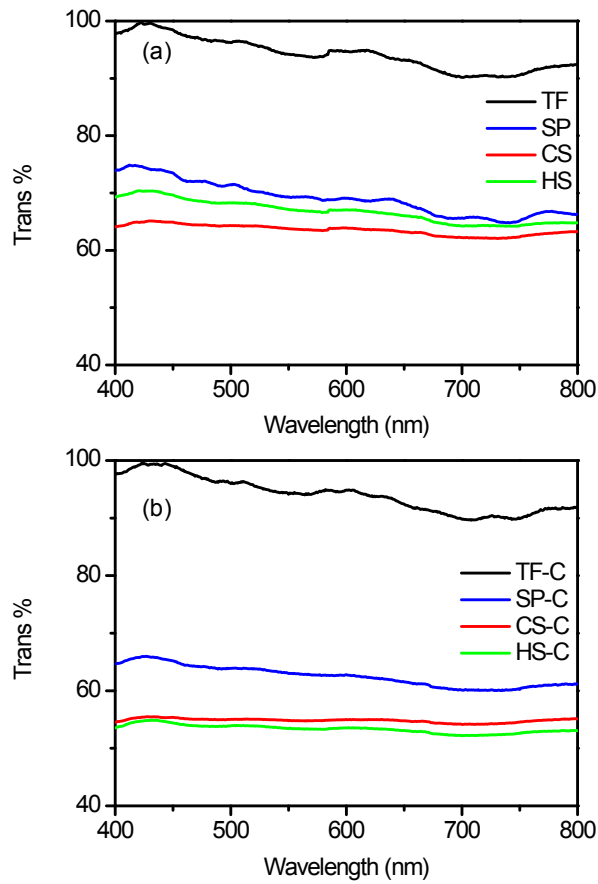

**Fig. S3.** Transmission spectra of films with different scattering layers before (a) and after (b) coating with an outer layer of TiO<sub>2</sub> film.

**Table S1.** Structural parameters of different TiO<sub>2</sub> samples.

| Samples                                  | $S_{BET}$ (m <sup>2</sup> ·g <sup>-1</sup> ) | $V_p$ (cm <sup>3</sup> ·g <sup>-1</sup> ) | D <sub>p</sub> (nm) |
|------------------------------------------|----------------------------------------------|-------------------------------------------|---------------------|
| TiO <sub>2</sub> nanoparticles           | 135                                          | 0.24                                      | 3.7                 |
| Solid TiO <sub>2</sub> microspheres      | 32                                           | 0.11                                      | 1.3                 |
| Core-shell TiO <sub>2</sub> microspheres | 62                                           | 0.48                                      | 1.8                 |
| Hollow TiO <sub>2</sub> microsphere      | 51                                           | 0.30                                      | 2.3                 |

**Table S2.** Thicknesses and the amounts of absorbed dye for DSSCs with different scattering layers encapsulated by an outer layer of the TiO<sub>2</sub> film.

| Samples | Thickness (um) | Absorbed dye<br>(× 10 <sup>-8</sup> mol/cm <sup>2</sup> ) |
|---------|----------------|-----------------------------------------------------------|
| TF-C    | 3.94           | 9.33                                                      |
| SP-C    | 3.98           | 8.97                                                      |
| CS-C    | 4.11           | 8.89                                                      |
| HS-C    | 4.09           | 8.81                                                      |
